# Supplementary material for: Unravelling the Inflammatory Processes in the Early Stages of Diabetic Nephropathy and the Potential Effect of (Ss)-DS-ONJ
Source: MDPI journal article supplement (doi:10.3390/ijms23158450), 2022-07-30
Supplement: s1 [file s1]

Table S1. Antibodies used for western-blot and immunofluorescence assays

| ANTIBODY              | COMPANY                                        | REFERENCE | DILUTION OF USE         |
|-----------------------|------------------------------------------------|-----------|-------------------------|
| iNOS                  | Abcam (Cambridge, UK)                          | ab15323   | 1:1000                  |
| Caspase-1 (p-10)      | Abcam (Cambridge, UK)                          | ab 179515 | 1:1000                  |
| E-cadherin            | BD Bioscience (Madrid, Spain)                  | BD610182  | 1:500 (WB)/ 1:250 (IHC) |
| LC3-I/II              | Cell Signaling Technologies (Danvers, MA, USA) | 12741     | 1:1000                  |
| Pp38-MAPK             | Cell Signaling Technologies (Danvers, MA, USA) | 9211      | 1:1000                  |
| p38-MAPK              | Cell Signaling Technologies (Danvers, MA, USA) | 9212      | 1:1000                  |
| P SAPK/JNK            | Cell Signaling Technologies (Danvers, MA, USA) | 9255      | 1:1000                  |
| SAPK/JNK              | Cell Signaling Technologies (Danvers, MA, USA) | 9252      | 1:1000                  |
| ZEB-1                 | Cell Signaling Technologies (Danvers, MA, USA) | 70512     | 1:1000                  |
| Snai-1                | Cell Signaling Technologies (Danvers, MA, USA) | 3879      | 1:1000                  |
| Slug                  | Cell Signaling Technologies (Danvers, MA, USA) | 9585      | 1:1000                  |
| p62                   | MBL (Japan)                                    | PM045     | 1:1000                  |
| $\alpha$ -SMA         | Sigma-Aldrich (St Louis, MO, USA)              | A2547     | 1:500 (WB)/ 1:500 (IHC) |
| p65                   | Santa Cruz Biotechnology (Dallas, Texas, USA)  | sc-372    | 1:500                   |
| $\alpha$ -tubulin     | Sigma-Aldrich (St Louis, MO, USA)              | T-5168    | 1:15000                 |
| Anti-rabbit IgG-HRP   | Sigma-Aldrich (St Louis, MO, USA)              | A0545     | 1:5000                  |
| Anti-mouse IgG-HRP    | Sigma-Aldrich (St Louis, MO, USA)              | A9044     | 1:5000                  |
| anti-rabbit Alexa 488 | Invitrogen (Carlsbad, CA, USA)                 | A32731    | 1:500                   |

Table S2. Rat and mouse probes used for RT-qPCR

| Taq-Man GENE EXPRESSION ASSAYS                                                                                                | COMPANY                   | REFERENCE                                                                                                           |
|-------------------------------------------------------------------------------------------------------------------------------|---------------------------|---------------------------------------------------------------------------------------------------------------------|
| <b>Rat:</b><br><i>Nos2</i><br><i>Tnfa</i><br><i>Il1b</i><br><i>Nlrp3</i><br><i>Il18</i><br><i>Cadherin-1</i><br><i>Acta-2</i> | Applied Biosystems, Spain | Rn00561646_m1<br>Rn99999017_m1<br>Rn00580432_m1<br>Rn04244620_m1<br>Rn01422083_m1<br>Rn00580109_m1<br>Rn01759928_g1 |

|                                                                                                                                                                 |                           |                                                                                                                                                       |
|-----------------------------------------------------------------------------------------------------------------------------------------------------------------|---------------------------|-------------------------------------------------------------------------------------------------------------------------------------------------------|
| <i>Tgfb</i><br><i>actinb</i>                                                                                                                                    |                           | Rn00572010_m1<br>Mm00607939_s1                                                                                                                        |
| <b>Mouse:</b><br><i>Nos2</i><br><i>Tnfa</i><br><i>Il1β</i><br><i>Nlrp3</i><br><i>Il18</i><br><i>Cadherin-1</i><br><i>Acta-2</i><br><i>Tgfb</i><br><i>actinb</i> | Applied Biosystems, Spain | Mm00440502_m1<br>Mm00443258_m1<br>Mm00434228_m1<br>Mm00840904_m1<br>Mm00434225_m1<br>Mm01247357_m1<br>Mm00725412_s1<br>Mm01178819_m1<br>Mm00607939_s1 |
